# Supplementary material
Source: HighWire-hosted journal article supplement (http://d2538ggaoe6cji.cloudfront.net/highwire/filestream/43675/field_highwire_adjunct_files/0/147017-1.pdf)
Supplement: 147017-1.pdf [file 147017-1.pdf]

## SUPPORTING INFORMATION

# Theoretical quantification of interference in the TASEP: application to mRNA translation shows near-optimality of termination rates

Khanh Dao Duc<sup>1,2</sup>, Zain H. Saleem<sup>1</sup>, and Yun S. Song<sup>1,2,3,4,\*</sup>

<sup>1</sup> Department of Mathematics, University of Pennsylvania, PA 19104, USA

<sup>2</sup> Department of Biology, University of Pennsylvania, PA 19104, USA

<sup>3</sup> Computer Science Division and Department of Statistics, University of California, Berkeley, CA 94720, USA

<sup>4</sup> Chan Zuckerberg Biohub, San Francisco, CA 94158

\* To whom correspondence should be addressed: yss@berkeley.edu

## 1 Equations satisfied by the correlators in the TASEP

Averaging the master equation associated with the TASEP, the particle densities satisfy the following relations [1]:

$$0 = \langle \tau_1 \rangle_N - \langle \tau_1 \tau_2 \rangle_N - \alpha(1 - \langle \tau_1 \rangle_N), \quad (\text{S1})$$

$$0 = \langle \tau_i \tau_{i+1} \rangle_N - \langle \tau_{i-1} \tau_i \rangle_N - \langle \tau_i \rangle_N + \langle \tau_{i-1} \rangle_N, \quad \text{for } 2 \leq i \leq N-1, \quad (\text{S2})$$

$$0 = \beta \langle \tau_N \rangle_N - \langle \tau_{N-1} \rangle_N + \langle \tau_{N-1} \tau_N \rangle_N. \quad (\text{S3})$$

Note that (S2) implies  $\langle \tau_i(1 - \tau_{i+1}) \rangle_N = \langle \tau_{i-1}(1 - \tau_i) \rangle_N$  for all  $i = 2, \dots, N-1$ . This translation-invariant quantity is called the current (or flux) and is denoted by  $J$ . One can also relate the two-point correlators with the three-point correlators as

$$0 = \langle \tau_1 \tau_2 \tau_3 \rangle_N - \langle \tau_1 \tau_2 \rangle_N(1 + \alpha) + \alpha \langle \tau_2 \rangle_N, \quad (\text{S4})$$

$$0 = \langle \tau_{i-1} \tau_i \tau_{i+1} \rangle_N - \langle \tau_{i-2} \tau_{i-1} \tau_i \rangle_N - \langle \tau_{i-1} \tau_i \rangle_N + \langle \tau_{i-2} \tau_i \rangle_N, \quad \text{for } 3 \leq i \leq N-1, \quad (\text{S5})$$

$$0 = \langle \tau_{N-2} \tau_{N-1} \tau_N \rangle_N - \langle \tau_{N-2} \tau_N \rangle_N + \beta \langle \tau_{N-1} \tau_N \rangle_N.$$

## 2 Description of the matrix Ansatz used in the simple TASEP

To derive analytical expressions for the average densities of the TASEP, Derrida *et al.* [2] showed that the steady state probability of a given configuration can be derived using a matrix formulation as

$$\mathbb{P}(t_1, \dots, t_N) = \frac{f_N(t_1, \dots, t_N)}{\sum_{\theta_1=0,1} \dots \sum_{\theta_N=0,1} f_N(\theta_1, \dots, \theta_N)},$$

where

$$f_N(t_1, \dots, t_N) = \langle W | \prod_{i=1}^N (t_i D + (1 - t_i) E) | V \rangle.$$

Here,  $D$  and  $E$  are infinite dimensional square matrices and  $|V\rangle$  and  $\langle W|$  are column and row vectors respectively satisfying

$$\begin{aligned} DE &= D + E, \\ D |V\rangle &= \frac{1}{\beta} |V\rangle, \\ \langle W| E &= \frac{1}{\alpha} \langle W|. \end{aligned}$$

Using this formulation, the particle density can be derived as

$$\langle \tau_i \rangle_N = \frac{\langle W | C^{i-1} D C^{N-i} | V \rangle}{\langle W | C^N | V \rangle},$$

where  $C = D + E$ . More generally, for any given index set  $i_1, i_2, \dots, i_k$  such that  $1 \leq i_1 < \dots < i_k \leq N$ , we get

$$\langle \tau_{i_1} \dots \tau_{i_k} \rangle_N = \frac{\langle W | C^{i_1-1} D C^{i_2-i_1-1} \dots C^{i_k-i_{k-1}-1} D C^{N-i_k} | V \rangle}{\langle W | C^N | V \rangle}.$$

Using these algebraic rules, Derrida et al. [2] obtained exact formulas for  $\langle \tau_i \rangle_N$ . More precisely, for  $i \leq N - 1$ ,

$$\langle \tau_i \rangle_N = \sum_{p=0}^{N-i-1} \frac{(2p)!}{p!(p+1)!} \frac{\langle W | C^{N-1-p} | V \rangle}{\langle W | C^N | V \rangle} + \frac{\langle W | C^{i-1} | V \rangle}{\langle W | C^N | V \rangle} \sum_{p=2}^{N-i+1} \frac{(p-1)(2N-2i-p)!}{(N-i)!(N-i+1-p)!} \frac{1}{\beta^p},$$

while for  $i = N$ ,

$$\langle \tau_N \rangle_N = \frac{1}{\beta} \frac{\langle W | C^{N-1} | V \rangle}{\langle W | C^N | V \rangle},$$

where

$$\langle W | C^N | V \rangle = \sum_{p=1}^N \frac{p(2N-1-p)!}{N!(N-p)!} \left[ \frac{\frac{1}{\beta^{p+1}} - \frac{1}{\alpha^{p+1}}}{\frac{1}{\beta} - \frac{1}{\alpha}} \right],$$

and  $\langle W | V \rangle = 1$ .

### 3 Computing the density of isolated particles

Using the matrix Ansatz, we derive here an analytical expression for the average density of isolated particles  $\langle \tau'_i \rangle_N$ . Our goal is to get  $\langle \tau'_i \rangle_N$  as a function of the average densities  $\langle \tau_j \rangle_N$ . The density of isolated particles inside the lattice ( $2 \leq i \leq N - 1$ ) is given by (see equation (2))

$$\langle \tau'_i \rangle_N = \langle \tau_i \rangle_N - \langle \tau_{i-1} \tau_i \rangle_N - \langle \tau_i \tau_{i+1} \rangle_N + \langle \tau_{i-1} \tau_i \tau_{i+1} \rangle_N. \quad (\text{S6})$$

For  $2 \leq j \leq N-1$ , we first derive the expression of the two point correlators  $\langle \tau_j \tau_{j+1} \rangle_N$  by summing equation (S2) over  $i \in \{2, \dots, j\}$  and using the boundary equation (S1)

$$\langle \tau_j \tau_{j+1} \rangle_N = \langle \tau_j \rangle_N - \alpha(1 - \langle \tau_1 \rangle_N). \quad (\text{S7})$$

Similarly, for  $3 \leq j \leq N-1$ , summing equation (S5) from  $i = 3$  to  $j$  and using boundary equations (S1) and (S4) gives

$$\begin{aligned} \langle \tau_{j-1} \tau_j \tau_{j+1} \rangle_N &= \langle \tau_1 \tau_2 \tau_3 \rangle_N + \sum_{p=3}^j \langle \tau_{p-1} \tau_p \rangle_N - \langle \tau_{p-2} \tau_p \rangle_N \\ &= (1 + \alpha)^2 \langle \tau_1 \rangle_N - \alpha(1 + \alpha + \langle \tau_2 \rangle_N) + \sum_{p=3}^j \langle \tau_{p-1} \tau_p \rangle_N - \langle \tau_{p-2} \tau_p \rangle_N. \end{aligned} \quad (\text{S8})$$

Using the matrix formulation and the identities  $DCD = D(DC - DE + ED) = DDC - DC + CD$ , we get

$$\begin{aligned} \langle \tau_{p-2} \tau_p \rangle_N &= \frac{\langle W | C^{p-3} D C D C^{N-p} | V \rangle}{\langle W | C^N | V \rangle} \\ &= \langle \tau_{p-2} \tau_{p-1} \rangle_N + J_N (\langle \tau_{p-1} \rangle_{N-1} - \langle \tau_{p-2} \rangle_{N-1}), \end{aligned} \quad (\text{S9})$$

where  $J_N = \frac{\langle W | C^{N-1} | V \rangle}{\langle W | C^N | V \rangle} = \alpha(1 - \langle \tau_1 \rangle_N)$  is the particle current at steady state [2]. Combining (S9) with (S8) and using (S6) and (S1) yield the result for the three-point correlator

$$\langle \tau_{j-1} \tau_j \tau_{j+1} \rangle_N = \langle \tau_{j-1} \rangle_N - \alpha[1 + \alpha + \langle \tau_2 \rangle_N - (2 + \alpha)\langle \tau_1 \rangle_N] - J_N (\langle \tau_{j-1} \rangle_{N-1} - \langle \tau_1 \rangle_{N-1}) \quad (\text{S10})$$

for  $3 \leq j \leq N-1$ . Using (S1) and (S4), this equation is also true for  $j = 2$ . Using (S10), (S7) and (2) gives us the formula for the density of isolated particles

$$\langle \tau'_i \rangle_N = \alpha[1 - \langle \tau_2 \rangle_N + \alpha(\langle \tau_1 \rangle_N - 1)] - J_N (\langle \tau_{i-1} \rangle_{N-1} - \langle \tau_1 \rangle_{N-1}), \quad \text{for } 2 \leq i \leq N-1.$$

Finally we can use  $J_N = \alpha(1 - \langle \tau_1 \rangle_N)$  to write the above formula in a more compact notation, as

$$\langle \tau'_i \rangle_N = D_0(\alpha, \beta, N) - D_1(\alpha, \beta, N) \langle \tau_{i-1} \rangle_{N-1}, \quad (\text{S11})$$

where

$$\begin{aligned} D_0(\alpha, \beta, N) &= \alpha[1 - \langle \tau_2 \rangle_N + \alpha(\langle \tau_1 \rangle_N - 1)] + \alpha(1 - \langle \tau_1 \rangle_N) \langle \tau_1 \rangle_{N-1}, \\ D_1(\alpha, \beta, N) &= \alpha(1 - \langle \tau_1 \rangle_N). \end{aligned}$$

Similarly, using equations (S1) and (S3) at the boundaries yields

$$\begin{aligned} \langle \tau'_1 \rangle_N &= \alpha(1 - \langle \tau_1 \rangle_N), \\ \langle \tau'_N \rangle_N &= \langle \tau_N \rangle_N(1 + \beta) - \langle \tau_{N-1} \rangle_N. \end{aligned}$$

## 4 Asymptotics of the simple TASEP

We provide here the asymptotics for the densities of the TASEP. For large lattice size  $N$ , the flux of particles  $J$  is given by [2]

$$J \sim \begin{cases} \frac{1}{4}, & \text{if } \alpha > \frac{1}{2}, \beta > \frac{1}{2} \text{ (MC regime),} \\ \alpha(1 - \alpha), & \text{if } \alpha < \frac{1}{2}, \beta > \alpha \text{ (LD regime),} \\ \beta(1 - \beta), & \text{if } \beta < \frac{1}{2}, \beta < \alpha \text{ (HD regime).} \end{cases}$$

The densities at the boundaries and at positions next to them are given by [2]

$$\begin{aligned} \langle \tau_1 \rangle_N &\sim 1 - \frac{J}{\alpha}, \\ \langle \tau_2 \rangle_N &\sim 1 - J - \left(\frac{J}{\alpha}\right)^2, \\ \langle \tau_{N-1} \rangle_N &\sim J + \left(\frac{J}{\beta}\right)^2, \\ \langle \tau_N \rangle_N &\sim \frac{J}{\beta}. \end{aligned}$$

Out of the boundaries and for large  $1 \ll n \ll N$  [2,3],

$$\langle \tau_{N-n} \rangle_N \sim \begin{cases} \frac{1}{2} - \frac{1}{2\sqrt{\pi n}} + \frac{(2\beta - 1)^2 + 4}{16\sqrt{\pi}(2\beta - 1)^2 n^{3/2}}, & \text{if } \alpha > \frac{1}{2}, \beta > \frac{1}{2} \text{ (MC regime),} \\ \alpha + \left(\frac{\alpha(1 - \alpha)}{\beta(1 - \beta)}\right)^{n+1} (1 - 2\beta), & \text{if } \alpha < \beta < \frac{1}{2} \text{ (LD I regime),} \\ \alpha + \frac{4^n (\alpha(1 - \alpha))^{n+1}}{\sqrt{\pi} n^{3/2}} \left[ \frac{1}{(1 - 2\beta)^2} - \frac{1}{(1 - 2\alpha)^2} \right], & \text{if } \alpha < \frac{1}{2} < \beta \text{ (LD II regime),} \\ 1 - \beta, & \text{if } \beta < \frac{1}{2}, \beta < \alpha \text{ (HD regime).} \end{cases}$$

Using these formulae in (S11) leads to asymptotics for the density of isolated particles.

## 5 Density of isolated particles in the bulk for the $\ell$ -TASEP

We compute here an estimate of the density of isolated particles of size  $\ell$  in the bulk ( $\langle \tau_i \rangle$ ,  $1 \ll i \ll N - \ell$ ). To do so, we use an approximation from Lakatos and Chou [4], assuming that the number of states of  $n$  particles of length  $\ell$ , confined to a length of  $N' \geq n\ell$  lattice sites, is given by the partition function [5]

$$Z(n, N') = \binom{N' - (\ell - 1)n}{n}. \quad (\text{S12})$$

For a given position  $i \in \{1, \dots, \leq N - l\}$ , we introduce  $x_i^-$  and  $x_i^+$  as the positions of the closest particles to the left and the right of  $i$ , respectively, so we get

$$\begin{aligned} \langle \tau'_i \rangle &= \mathbb{P}(\tau_i = 1, x_i^- < i - \ell, x_i^+ > i + \ell) \\ &= \mathbb{P}(\tau_i = 1) \mathbb{P}(x_i^- < i - \ell, x_i^+ > i + \ell \mid \tau_i = 1). \end{aligned} \quad (\text{S13})$$

Assuming  $x_i^-$  and  $x_i^+$  being independent yields

$$\langle \tau'_i \rangle = \mathbb{P}(\tau_i = 1) \mathbb{P}(x_i^- < i - \ell \mid \tau_i = 1) \mathbb{P}(x_i^+ > i + \ell \mid \tau_i = 1).$$

Using (S12), the probability  $p_{n, N'}^+$  that  $x_i^+ > i + \ell$ , conditioned on  $\tau_i = 1$  and there being  $n$  particles in the window  $[i + \ell : i + \ell + N' - 1]$  is

$$p_{n, N'}^+ = \frac{Z(n, N' - 1)}{Z(n, N')} = \frac{1 - \rho \ell}{1 - \rho(\ell - 1)}, \quad (\text{S14})$$

where  $\rho = \frac{n}{N'}$ . When  $n$  and  $N'$  get large and assuming the density of particles in the bulk of the lattice to be approximately constant (denoted  $\langle \tau \rangle$ ), we can replace  $p_{n, N'}^+$  and  $\rho$  in equation (S14) by  $\mathbb{P}(x_i^+ > i + \ell \mid \tau_i = 1)$  and  $\langle \tau \rangle$ , respectively, which gives

$$\mathbb{P}(x_i^+ > i + \ell \mid \tau_i = 1) = \frac{1 - \langle \tau \rangle \ell}{1 - \langle \tau \rangle (\ell - 1)}.$$

Similarly, we obtain  $\mathbb{P}(x_i^- < i - \ell \mid \tau_i = 1) = \frac{1 - \langle \tau \rangle \ell}{1 - \langle \tau \rangle (\ell - 1)}$ . Combining these relations and replacing  $\mathbb{P}(\tau_i = 1)$  by  $\langle \tau \rangle$  in equation (S13), we obtain that the density of isolated particles in the bulk, simply denoted  $\langle \tau' \rangle$ , is given by

$$\langle \tau' \rangle = \langle \tau \rangle \left( \frac{1 - \ell \langle \tau \rangle}{1 - (\ell - 1) \langle \tau \rangle} \right)^2. \quad (\text{S15})$$

Similarly, for isolation range  $d$ , we obtain

$$\langle \tau_i^{(d)} \rangle \sim \mathbb{P}(\tau_i = 1) \left[ \frac{Z(n, N' - d)}{Z(n, N')} \right]^2,$$

which simplifies to the following expression in the large- $N$  limit:

$$\langle \tau^{(d)} \rangle \sim \langle \tau \rangle \left[ \frac{1 - \ell \langle \tau \rangle}{1 - (\ell - 1) \langle \tau \rangle} \right]^{2d}.$$

## 6 Asymptotics of the $\ell$ -TASEP

We provide here the asymptotics for the densities and current of the TASEP with extended particles and open boundaries from the mean field model of Lakatos and Chou [4]. The current is given by

$$J \sim \begin{cases} \frac{1}{(1 + \sqrt{\ell})^2}, & \text{if } \alpha > \alpha^*, \beta > \beta^* \text{ (MC regime),} \\ \frac{\alpha(1 - \alpha)}{1 + (\ell - 1)\alpha}, & \text{if } \alpha < \alpha^*, \beta > \alpha \text{ (LD regime),} \\ \frac{\beta(1 - \beta)}{1 + (\ell - 1)\beta}, & \text{if } \beta < \beta^*, \beta < \alpha \text{ (HD regime),} \end{cases} \quad (\text{S16})$$

where  $\alpha^* = \beta^* = \frac{1}{1 + \sqrt{\ell}}$ . The density  $\langle \tau_i \rangle$  in the bulk (position  $i \in [\ell + 1 : N - \ell - 1]$ ) is then approximated by

$$\langle \tau \rangle \sim \begin{cases} \frac{1}{\sqrt{\ell}(\sqrt{\ell} + 1)}, & \text{if } \alpha > \alpha^*, \beta > \beta^* \text{ (MC regime),} \\ \frac{1 + (\ell - 1)J - \sqrt{(1 + (\ell - 1)J)^2 - 4\ell J}}{2\ell}, & \text{if } \alpha < \alpha^*, \beta > \alpha \text{ (LD regime),} \\ \frac{1 + (\ell - 1)J + \sqrt{(1 + (\ell - 1)J)^2 - 4\ell J}}{2\ell}, & \text{if } \beta < \beta^*, \beta < \alpha \text{ (HD regime).} \end{cases}$$

Using these formulae in (S15) leads to asymptotics for the density of isolated particles.

## References

- [1] Derrida B, Domany E, Mukamel D (1992) An exact solution of a one-dimensional asymmetric exclusion model with open boundaries. *Journal of Statistical Physics* 69(3-4):667–687.
- [2] Derrida B, Evans MR, Hakim V, Pasquier V (1993) Exact solution of a 1d asymmetric exclusion model using a matrix formulation. *Journal of Physics A: Mathematical and General* 26(7):1493.
- [3] Blythe RA, Evans MR (2007) Nonequilibrium steady states of matrix-product form: a solver's guide. *Journal of Physics A: Mathematical and Theoretical* 40(46):R333.
- [4] Lakatos G, Chou T (2003) Totally asymmetric exclusion processes with particles of arbitrary size. *Journal of Physics A: Mathematical and General* 36(8):2027.
- [5] Buschle J, Maass P, Dieterich W (2000) Exact density functionals in one dimension. *Journal of Physics A: Mathematical and General* 33(4):L41.
- [6] Weinberg DE, et al. (2016) Improved ribosome-footprint and mrna measurements provide insights into dynamics and regulation of yeast translation. *Cell Reports* 14(7):1787–1799.
- [7] Arava Y, et al. (2003) Genome-wide analysis of mRNA translation profiles in *Saccharomyces cerevisiae*. *Proceedings of the National Academy of Sciences* 100(7):3889–3894.

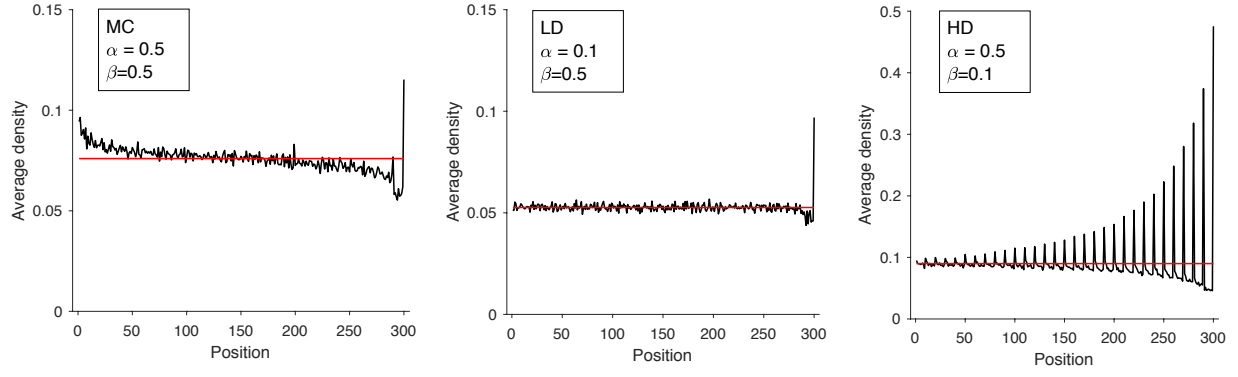

**Figure S1: The density of particles in the  $\ell$ -TASEP model.** We simulated and plot (in black) the density of particles of the  $\ell$ -TASEP ( $\ell = 10$ ) in the different regimes LD, HD and MC. In red, we plot the estimates of the density in the bulk from Lakatos and Chou [4].

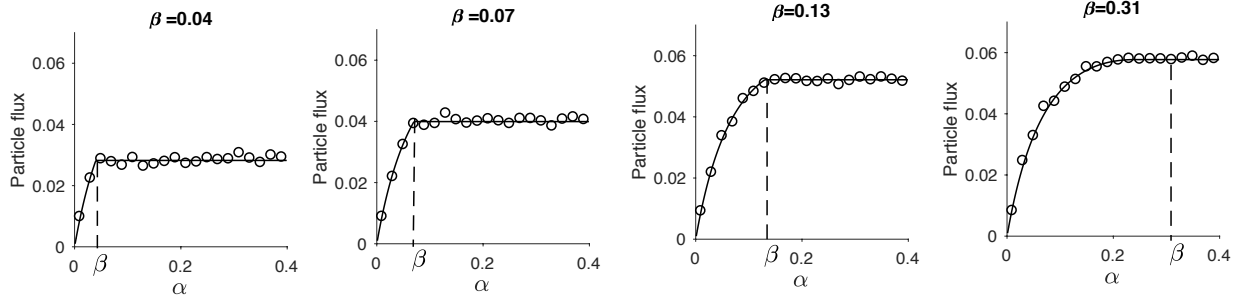

**Figure S2: The particle flux in the  $\ell$ -TASEP model in function of  $\alpha$ .** For different values of  $\beta$ , we compare in function of  $\alpha$  the flux obtained from Monte Carlo simulations (same as in **Figure 3B**) and asymptotic estimates from Lakatos and Chou [4], given by equation (S16).



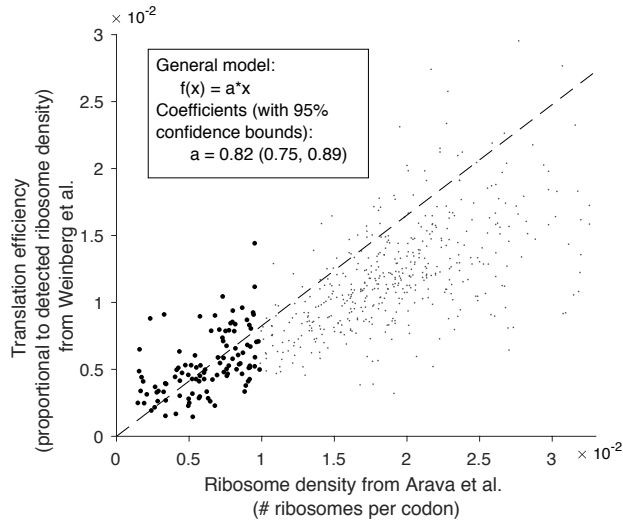

**Figure S3:** The plot shows the translation efficiency (the number of ribosomes per codon for each mRNA copy, up to a constant) obtained from ribosome profiling data in *S. cerevisiae* (Weinberg *et al.* [6]) against the total ribosome density obtained from polysome profiling (Arava *et al.* [7]). Applying a linear fit  $y = ax$  (plotted in dotted line) to genes with total density less than 1 ribosome per 100 codons gives, with 95% confidence interval,  $a = 0.82 (0.75, 0.89)$ .

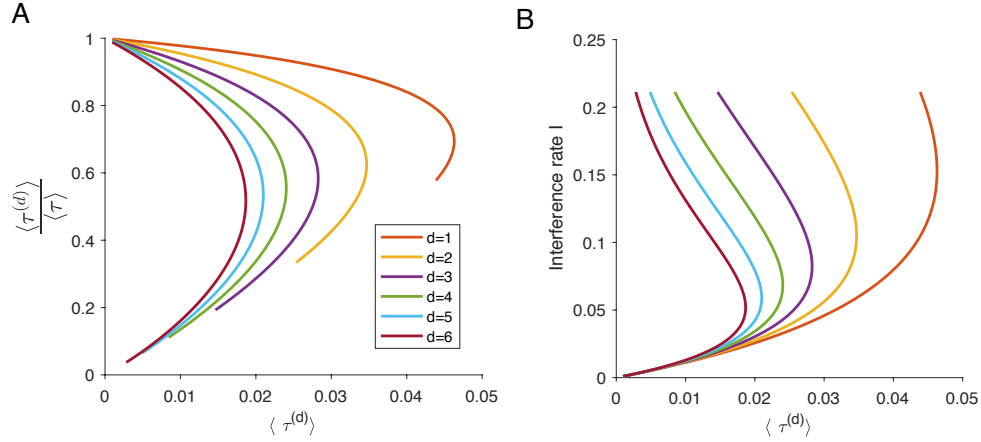

**Figure S4: The fraction of isolated particles and interference rate as a function of  $\langle \tau^{(d)} \rangle$ .** **A:** For different isolation ranges  $d \in \{1, \dots, 6\}$ , we plot the fraction of isolated particles as a function of the average density of isolated particles  $\langle \tau^{(d)} \rangle$ , according to (16). Note that for given  $d$ , some values of  $\langle \tau^{(d)} \rangle$  can lead to two possible fractions of isolated particles. **B:** As in **A**, we plot the isolation rate as a function of the average density of isolated particles  $\langle \tau^{(d)} \rangle$ , according to (17). Note that for  $\langle \tau^{(d)} \rangle \leq 0.02$  and all  $d$ , the initiation rates associated with the lower branch are very close.
